# Supplementary material for: Associations of Obstructive Sleep Apnea, Obestatin, Leptin, and Ghrelin with Gastroesophageal Reflux
Source: MDPI journal article supplement (doi:10.3390/jcm10215195), 2021-11-07
Supplement: s1 [file s1]

## KWESTIONARIUSZ OBJAWÓW REFLUKSOWYCH

DATA ..... NAZWISKO i IMIĘ .....

Telefon kontaktowy: .....

**Zgaga-** uczucie pieczenia lub palenia za mostkiem które promieniuje do szyi i gardła, któremu towarzyszy cofanie się kwaśnej treści do jamy ustnej.

Poniższa skala w postaci strzałki ujmuje dokuczliwość objawów zgagi od 0- brak objawów; do 100- skrajna dokuczliwość (objawy są bardzo częste i niezwykle silne).

Proszę ocenić **dokuczliwość zgagi u Pana(-i) w okresie ostatniego miesiąca**, zakreślając na linii kreskę w wybranym miejscu między 0 a 100.

W ostatnim miesiącu objawy zgagi

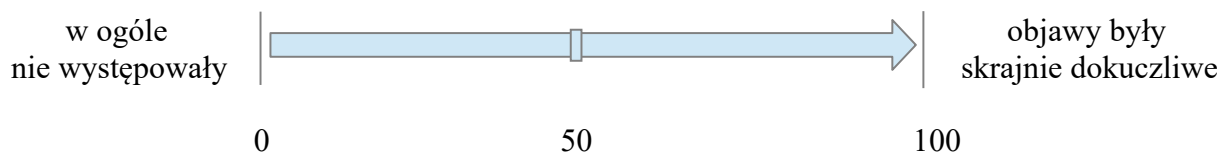

Na poniższym rysunku proszę zaznaczyć obszar, w którym zazwyczaj odczuwa Pan(i) pieczenie lub palenie.

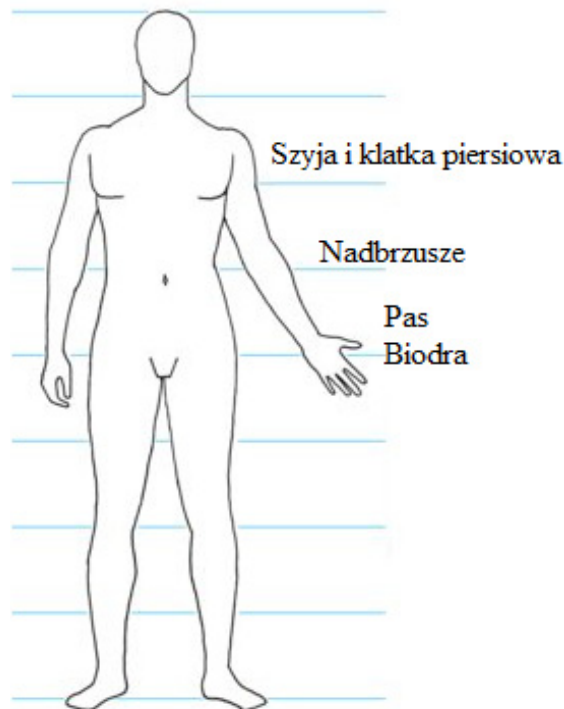

## OBJAWY W OKRESIE OSTATNIEGO MIESIĄCA

Proszę zakreślić kółkiem wybraną odpowiedź

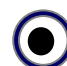

1/ Czy uczucie pieczenia/palenia w klatce piersiowej pojawiało się **po posiłkach**

JAK CZĘSTO?

0

nie występowało

1

sporadycznie  
1-2 razy w ciągu  
miesiąca

2

rzadko  
raz w tygodniu lub  
rzadziej

3

często  
kilka razy w  
tygodniu

4

bardzo często  
prawie po każdym  
posiłku

Z JAKIM  
NASILENIEM?

1

łagodne  
nie zwracające uwagi

2

umiarkowane  
zwracało uwagę

3

silne  
przeszkadzające

4

bardzo silne  
trudne do zniesienia

2/ Czy uczucie pieczenia/palenia pojawiało się **w pozycji leżącej?**

JAK CZĘSTO?

0

nie występowało

1

sporadycznie  
1-2 razy w ciągu  
miesiąca

2

rzadko  
raz w tygodniu lub  
rzadziej

3

często  
kilka razy w tygodniu

4

bardzo często  
prawie zawsze

Z JAKIM  
NASILENIEM?

1

łagodne  
nie zwracające uwagi

2

umiarkowane  
zwracało uwagę

3

silne  
przeszkadzające

4

bardzo silne  
trudne do zniesienia

3/ Czy uczucie pieczenia/palenia pojawiało się **przy schylaniu?**

JAK CZĘSTO?

0

nie występowało

1

sporadycznie  
1-2 razy w ciągu  
miesiąca

2

rzadko  
raz w tygodniu lub  
rzadziej

3

często  
kilka razy w  
tygodniu

4

bardzo często  
prawie przy każdej  
próbie schylania się

Z JAKIM  
NASILENIEM?

1

łagodne  
nie zwracające uwagi

2

umiarkowane  
zwracało uwagę

3

silne  
przeszkadzające

4

bardzo silne  
trudne do zniesienia

4/ Czy występowały **odbijania** lub uczucie **cofania się pokarmu z żołądka** z pozostawianiem kwaśnego lub gorzkiego smaku w jamie ustnej?

JAK CZĘSTO?

0

nie występowało

1

sporadycznie  
1-2 razy w ciągu  
miesiąca

2

rzadko  
raz w tygodniu lub  
rzadziej

3

często  
kilka razy w tygodniu

4

bardzo często  
codziennie lub  
prawie codziennie

Z JAKIM  
NASILENIEM?

1

łagodne  
nie zwracające uwagi

2

umiarkowane  
zwracało uwagę

3

silne  
przeszkadzające

4

bardzo silne  
trudne do zniesienia

5/ Czy miał (-a) Pan (-i) uczucie **zatrzymywania się połykanego pokarmu** w gardle lub w przełyku?

JAK CZĘSTO?

- |                 |                                                  |                                              |                                        |                                                        |
|-----------------|--------------------------------------------------|----------------------------------------------|----------------------------------------|--------------------------------------------------------|
| <b>0</b>        | <b>1</b>                                         | <b>2</b>                                     | <b>3</b>                               | <b>4</b>                                               |
| nie występowało | <b>sporadycznie</b><br>1-2 razy w ciągu miesiąca | <b>rzadko</b><br>raz w tygodniu lub rzadziej | <b>często</b><br>kilka razy w tygodniu | <b>bardzo często</b><br>przy większości prób połykania |

Z JAKIM  
NASILENIEM?

- |                                        |                                      |                                 |                                             |
|----------------------------------------|--------------------------------------|---------------------------------|---------------------------------------------|
| <b>1</b>                               | <b>2</b>                             | <b>3</b>                        | <b>4</b>                                    |
| <b>łagodne</b><br>nie zwracające uwagi | <b>umiarkowane</b><br>zwracało uwagę | <b>silne</b><br>przeszkadzające | <b>bardzo silne</b><br>trudne do zniesienia |

6/ Czy uczucie pieczenia/palenia w klatce piersiowej **utrudniało zaśnięcie lub wybudzało** Pana/Panią w nocy **ze snu**?

JAK CZĘSTO?

- |                 |                                                  |                                              |                                        |                                                  |
|-----------------|--------------------------------------------------|----------------------------------------------|----------------------------------------|--------------------------------------------------|
| <b>0</b>        | <b>1</b>                                         | <b>2</b>                                     | <b>3</b>                               | <b>4</b>                                         |
| nie występowało | <b>sporadycznie</b><br>1-2 razy w ciągu miesiąca | <b>rzadko</b><br>raz w tygodniu lub rzadziej | <b>często</b><br>kilka razy w tygodniu | <b>bardzo często</b><br>co noc lub prawie co noc |

7/ Czy zdarzało się, że miał Pan (-i) uczucie kwaśnego lub gorzkiego smaku w ustach **po nocnym wypoczynku**?

JAK CZĘSTO?

- |                 |                                                  |                                              |                                        |                                                          |
|-----------------|--------------------------------------------------|----------------------------------------------|----------------------------------------|----------------------------------------------------------|
| <b>0</b>        | <b>1</b>                                         | <b>2</b>                                     | <b>3</b>                               | <b>4</b>                                                 |
| nie występowało | <b>sporadycznie</b><br>1-2 razy w ciągu miesiąca | <b>rzadko</b><br>raz w tygodniu lub rzadziej | <b>często</b><br>kilka razy w tygodniu | <b>bardzo często</b><br>codziennie lub prawie codziennie |

8/ Czy zdarzało się, że **odbijania** lub uczucie **cofania się pokarmu z żołądka do z** pozostawianiem kwaśnego lub gorzkiego smaku w jamie ustnej **utrudniało zaśnięcie lub wybudzało** Pana/Panią w nocy **ze snu**?

JAK CZĘSTO?

- |                 |                                                  |                                              |                                        |                                                  |
|-----------------|--------------------------------------------------|----------------------------------------------|----------------------------------------|--------------------------------------------------|
| <b>0</b>        | <b>1</b>                                         | <b>2</b>                                     | <b>3</b>                               | <b>4</b>                                         |
| nie występowało | <b>sporadycznie</b><br>1-2 razy w ciągu miesiąca | <b>rzadko</b><br>raz w tygodniu lub rzadziej | <b>często</b><br>kilka razy w tygodniu | <b>bardzo często</b><br>co noc lub prawie co noc |

9/ Jak często w okresie ostatniego miesiąca pojawiały się u Pana/Pani:

| 0     | 1                                            | 2                                        | 3                                  | 4                                                    |
|-------|----------------------------------------------|------------------------------------------|------------------------------------|------------------------------------------------------|
| wcale | sporadycznie<br>1-2 razy w<br>ciągu miesiąca | rzadko<br>raz w tygodniu<br>lub rzadziej | często<br>kilka razy w<br>tygodniu | bardzo często<br>codziennie lub<br>prawie codziennie |

Bóle w klatce piersiowej

Uczucie ropierania w klatce  
piersiowej w trakcie jedzenia

Ból za mostkiem przy połykaniu

Uczucie pełności w nadbrzuszu

Nudności

Wymioty

Uczucie dławienia w gardle

Krztuszenie się w trakcie jedzenia

Suchość w ustach

Chrypka

Przewlekły kaszel

Uczucie duszności

#### OBJAWY KLINICZNE GERD:

|               |                    |       |
|---------------|--------------------|-------|
| Suma punktów: | dzienne (ptk.1-5): | ..... |
|               | nocne (ptk.6-8):   | ..... |
|               | inne (ptk.9):      | ..... |

#### BADANIE PODMIOTOWE

Wzrost: \_\_\_\_\_

Miejsce wkłucia: .....

Waga: \_\_\_\_\_

23<sup>00</sup>: .....

Obwód szyi: \_\_\_\_\_

1<sup>00</sup>: .....

Obwód pasa: \_\_\_\_\_

3<sup>00</sup>: .....

5<sup>00</sup>: .....

7<sup>00</sup>: .....

Przyjmowane leki: \_\_\_\_\_

PPI/H<sub>2</sub>-B (w dawce) \_\_\_\_\_

Leki nasilające bezdech: \_\_\_\_\_

Istotne dla OSA lub GERD i greliny, przebyte operacje (twarzoczaszki, operacje na przewodzie pokarmowym np. resekcja żołądka): \_\_\_\_\_

---

---

---

---

Proszę o zaznaczenie na poniższej tabeli prawdopodobieństwa zaśnięcia we wskazanych sytuacjach w ciągu ostatnich 6 tygodni.

|                                          |                                       |
|------------------------------------------|---------------------------------------|
| 0 – zerowe prawdopodobieństwo zaśnięcia  | 1 – małe prawdopodobieństwo zaśnięcia |
| 2 – średnie prawdopodobieństwo zaśnięcia | 3 – duże prawdopodobieństwo zaśnięcia |

| Sytuacja                                                                        | Proszę zaznaczyć właściwą odpowiedź |   |   |   |
|---------------------------------------------------------------------------------|-------------------------------------|---|---|---|
| Siedzenie i czytanie                                                            | 0                                   | 1 | 2 | 3 |
| Oglądanie telewizji                                                             | 0                                   | 1 | 2 | 3 |
| Bierne siedzenie w miejscach publicznych (np. w teatrze, na zebraniu)           | 0                                   | 1 | 2 | 3 |
| Jako pasażer w samochodzie, jadąc przez godzinę bez odpoczynku                  | 0                                   | 1 | 2 | 3 |
| Leżenie i odpoczywanie po południu, jeśli okoliczności na to pozwalają          | 0                                   | 1 | 2 | 3 |
| W czasie rozmowy, siedząc                                                       | 0                                   | 1 | 2 | 3 |
| Spokojne siedzenie po obiedzie bez alkoholu                                     | 0                                   | 1 | 2 | 3 |
| W samochodzie, podczas kilkuminutowego postoju w korku lub na czerwonym świetle | 0                                   | 1 | 2 | 3 |

## Kwestionariusz berliński.

Proszę zaznaczyć odpowiedź przy każdym pytaniu.

### KATEGORIA 1

**1.** Czy chrapiesz?

- ☐ a. Tak
- ☐ b. Nie
- ☐ c. Nie wiem

Jeżeli chrapiesz to:

**2.** Czy twoje chrapanie jest:

- ☐ a. Nieco głośniejsze niż oddychanie
- ☐ b. Tak głośne jak mowa
- ☐ c. Głośniejsze niż mowa
- ☐ d. Bardzo głośne – może być słyszalne w sąsiednich pomieszczeniach

**3.** Jak często chrapiesz?

- ☐ a. Prawie zawsze
- ☐ b. 3-4 razy w tygodniu
- ☐ c. 1-2 razy w tygodniu
- ☐ d. 1-2 razy w miesiącu
- ☐ e. Nigdy lub prawie nigdy

**4.** Czy twoje chrapanie przeszkadza innym osobom?

- ☐ a. Tak
- ☐ b. Nie
- ☐ c. Nie wiem

**5.** Czy kiedykolwiek ktoś zauważył, że przestajesz oddychać podczas snu?

- ☐ a. Prawie zawsze
- ☐ b. 3-4 razy w tygodniu
- ☐ c. 1-2 razy w tygodniu
- ☐ d. 1-2 razy w miesiącu
- ☐ e. Nigdy lub prawie nigdy

### KATEGORIA 2

**6.** Jak często czujesz się zmęczony po przebudzeniu?

- ☐ a. Prawie zawsze
- ☐ b. 3-4 razy w tygodniu
- ☐ c. 1-2 razy w tygodniu
- ☐ d. 1-2 razy w miesiącu
- ☐ e. Nigdy lub prawie nigdy

**7.** Jak często w ciągu dnia czujesz się zmęczony lub jesteś w gorszej formie?

- ☐ a. Prawie zawsze
- ☐ b. 3-4 razy w tygodniu
- ☐ c. 1-2 razy w tygodniu
- ☐ d. 1-2 razy w miesiącu
- ☐ e. Nigdy lub prawie nigdy

**8.** Czy kiedykolwiek przysypiałeś lub zasnąłeś prowadząc pojazd mechaniczny?

- ☐ a. Tak
- ☐ b. Nie

Jeżeli Tak to:

**9.** Jak często to się zdarza?

- ☐ a. Prawie zawsze
- ☐ b. 3-4 razy w tygodniu
- ☐ c. 1-2 razy w tygodniu
- ☐ d. 1-2 razy w miesiącu
- ☐ e. Nigdy lub prawie nigdy

### KATEGORIA 3

**10.** Czy masz nadciśnienie tętnicze?

- ☐ Tak
- ☐ Nie
- ☐ Nie wiem

Osobna strona (w załączeniu): polisomno/poligrafia; wyniki badań lab. i oznaczeń laboratoryjnych
